# Supplementary material for: Aquatic Toxicity Effects and Risk Assessment of ‘Form Specific’ Product-Released Engineered Nanomaterials
Source: MDPI journal article supplement (doi:10.3390/ijms222212468), 2021-11-18
Supplement: s1 [file s1]

Article

# Aquatic Toxicity Effects and Risk Assessment of ‘Form Specific’ Product-Released Engineered Nanomaterials

Raisibe Florence Lehutso <sup>1,2</sup>, James Wesley-Smith <sup>3</sup> and Melusi Thwala <sup>1,4\*</sup>

<sup>1</sup> Water Centre, Council for Scientific and Industrial Research, Pretoria 0001, South Africa

<sup>2</sup> Department of Chemical Sciences, University of Johannesburg, Johannesburg 2028, South Africa

<sup>3</sup> Electron Microscope Unit, Sefako Makgatho Health Sciences University, Pretoria 0001, South Africa

<sup>4</sup> Centre for Environmental Management, University of the Free State, Bloemfontein 9031, South Africa

\* Correspondence: mthwala@csir.co.za

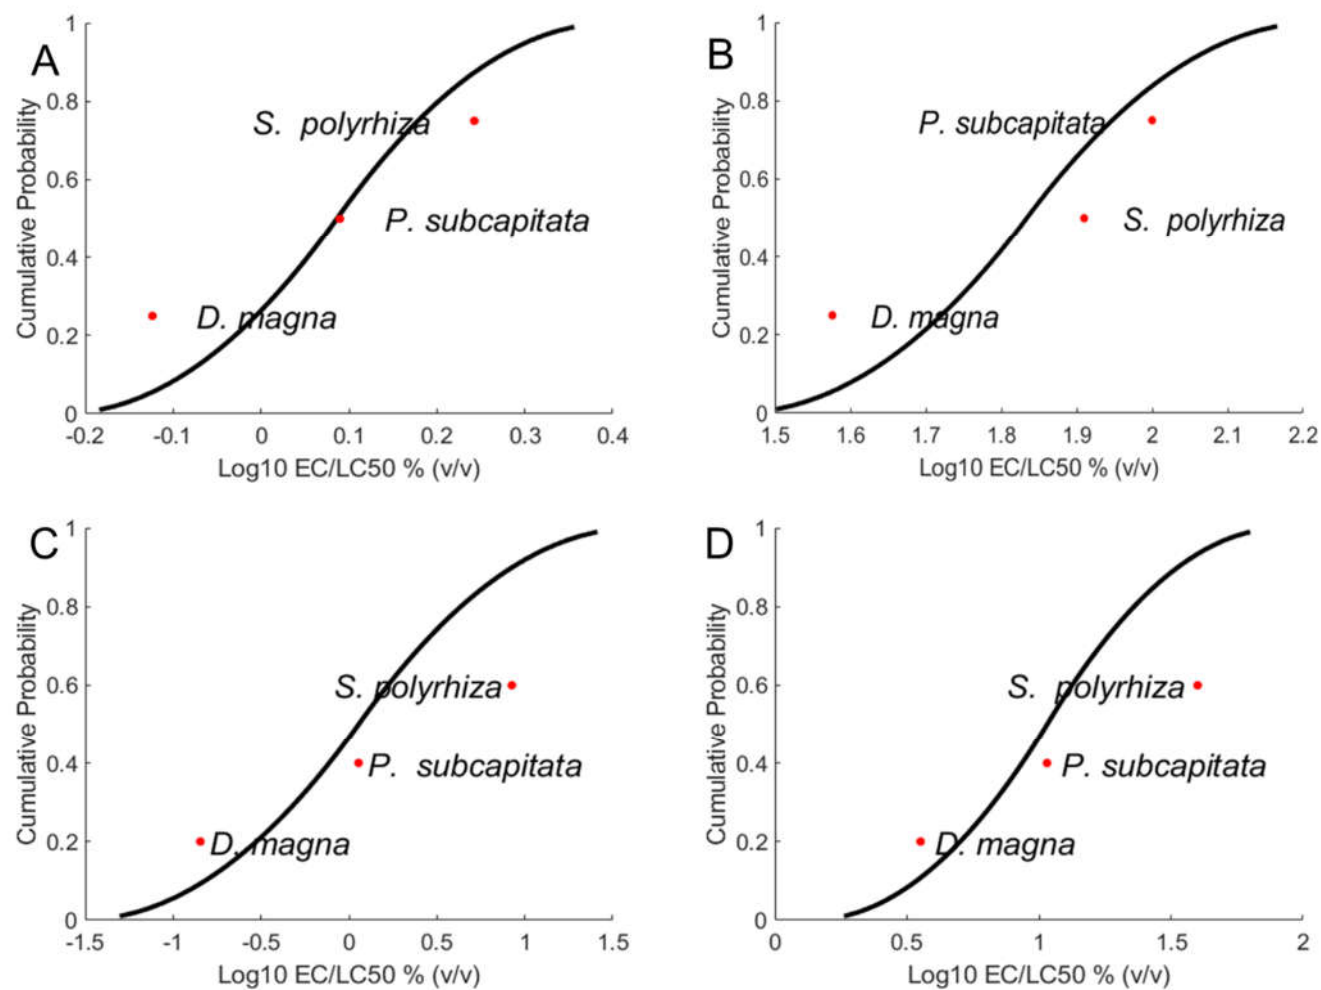

**Figure S1.** Species sensitivity distributions plot illustrating different responses of the three aquatic organisms to SUN1 (A), CA1 (B) SAN1 ions; in all cases, *D. magna* was the most sensitive organism.

### 1.1. S. Evaluation of binary PR-ENMs

SUN1 PR-nTiO<sub>2</sub> and PR-nZnO mainly induced synergistic or antagonistic effects in the three test organisms (Figures 2A–C). The observed effects of PR-nTiO<sub>2</sub> and PR-nZnO and the predicted effects were significantly different. Few exceptions where PR-nZnO-induced additive effects were recorded. PR-nZnO obtained under dark conditions induced additive effects on *S. polyrhiza*. Additive effects were also induced on *D. magna* at 24 h and 48 h by PR-nZnO obtained under light and dark conditions, respectively. As the analyte responsible for causing either synergistic or antagonistic effects could not be established, the LC/EC<sub>50</sub> expression relative to the total concentration of an analyte was considered impossible for SUN1 and therefore was not determined. CA1 and SK1 PR-nTiO<sub>2</sub> and PR-nAg induced either synergistic or antagonistic effects in all three test organisms in all test scenarios (Figures S2A–C). The observed effects [P(O)] and theoretical effects [P(E)] were different. Similarly, to SUN1 PR-ENMs, the LC/EC<sub>50</sub> expression relative to an analyte's total concentration was considered impossible and thus not determined.

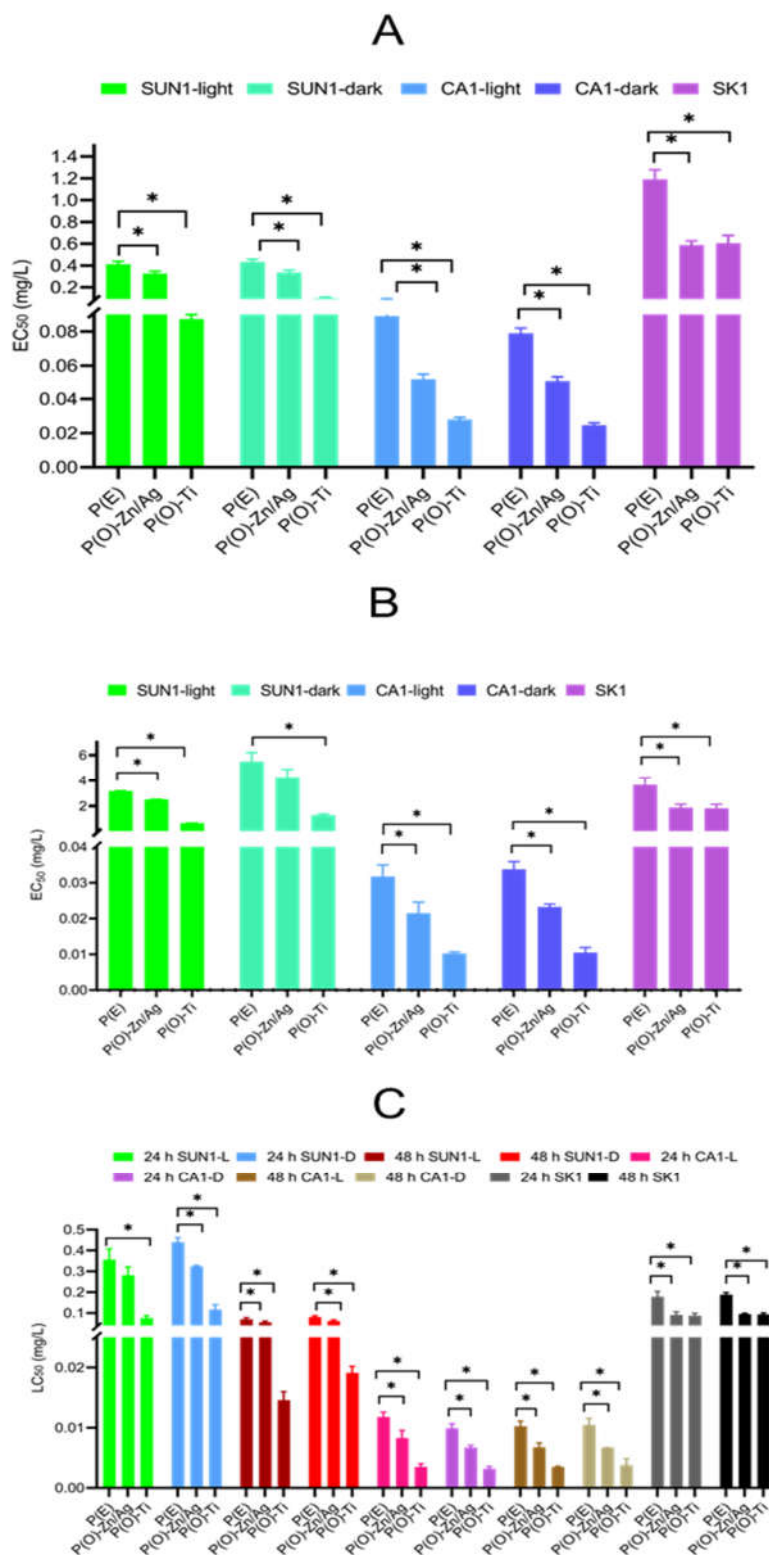

**Figure S2.** Comparison between theoretically expected [P(E)] and observed [P(O)] effects of SUN1, CA1 and SK1 PR-ENMs investigated on *P. subcapitata* (A), *S. polyrhiza* (B), and *D. magna* (C). \* indicate statistical difference at  $p$ -value  $\leq 0.05$ .

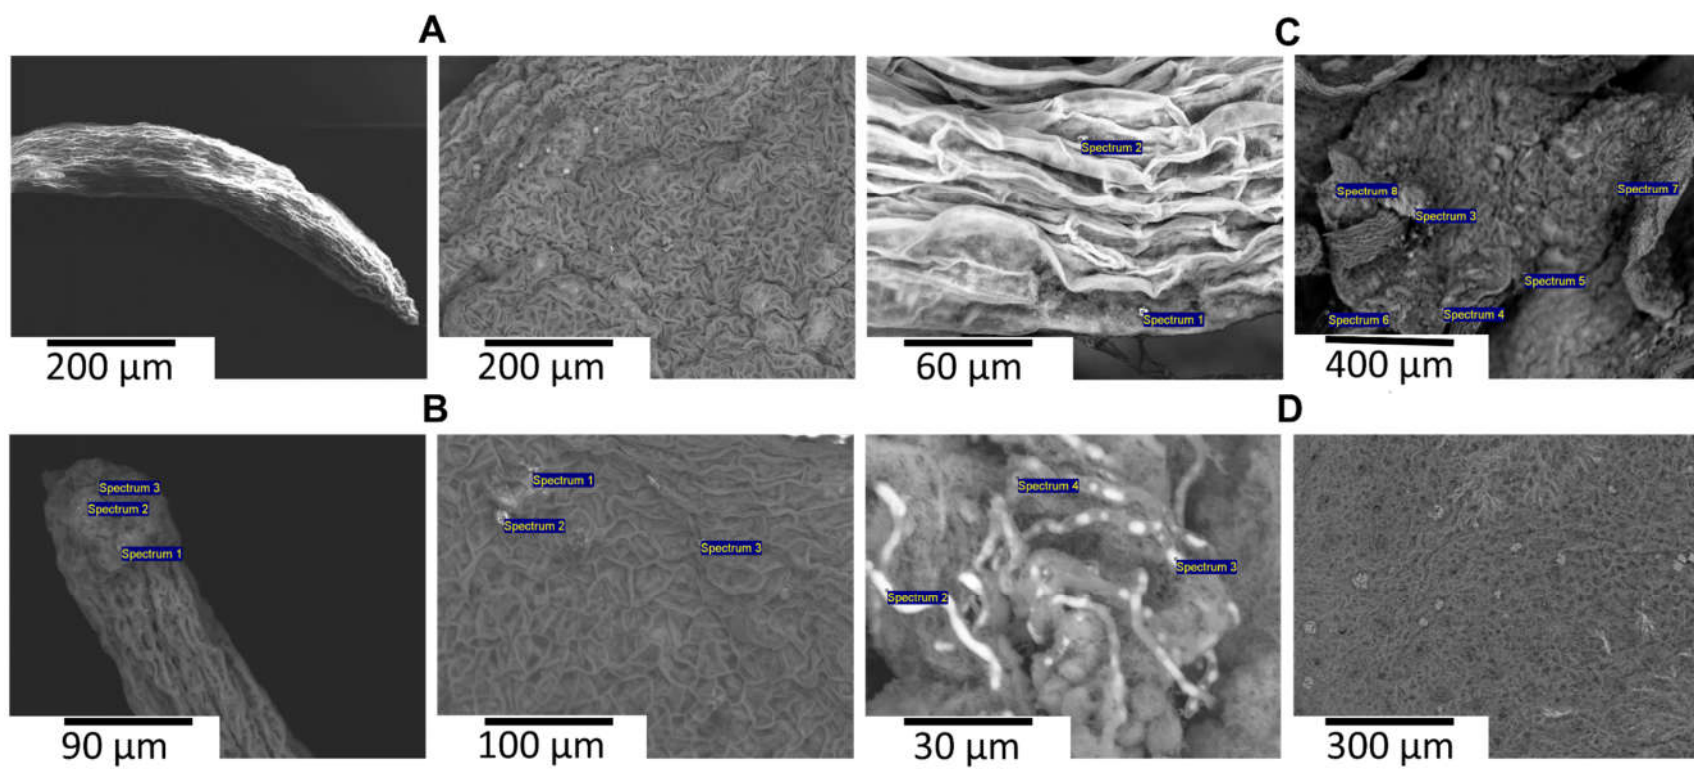

**Figure S3.** SEM images of the root (left) and frond (right) of *S. polyrhiza* control (A), *S. polyrhiza* exposed to 100 % (v/v) of SUN1 (B), SUN2 (C), and SUN3 (D) PR-ENMs; spectrum number points to the adsorbed SUNs' PR-ENMs.

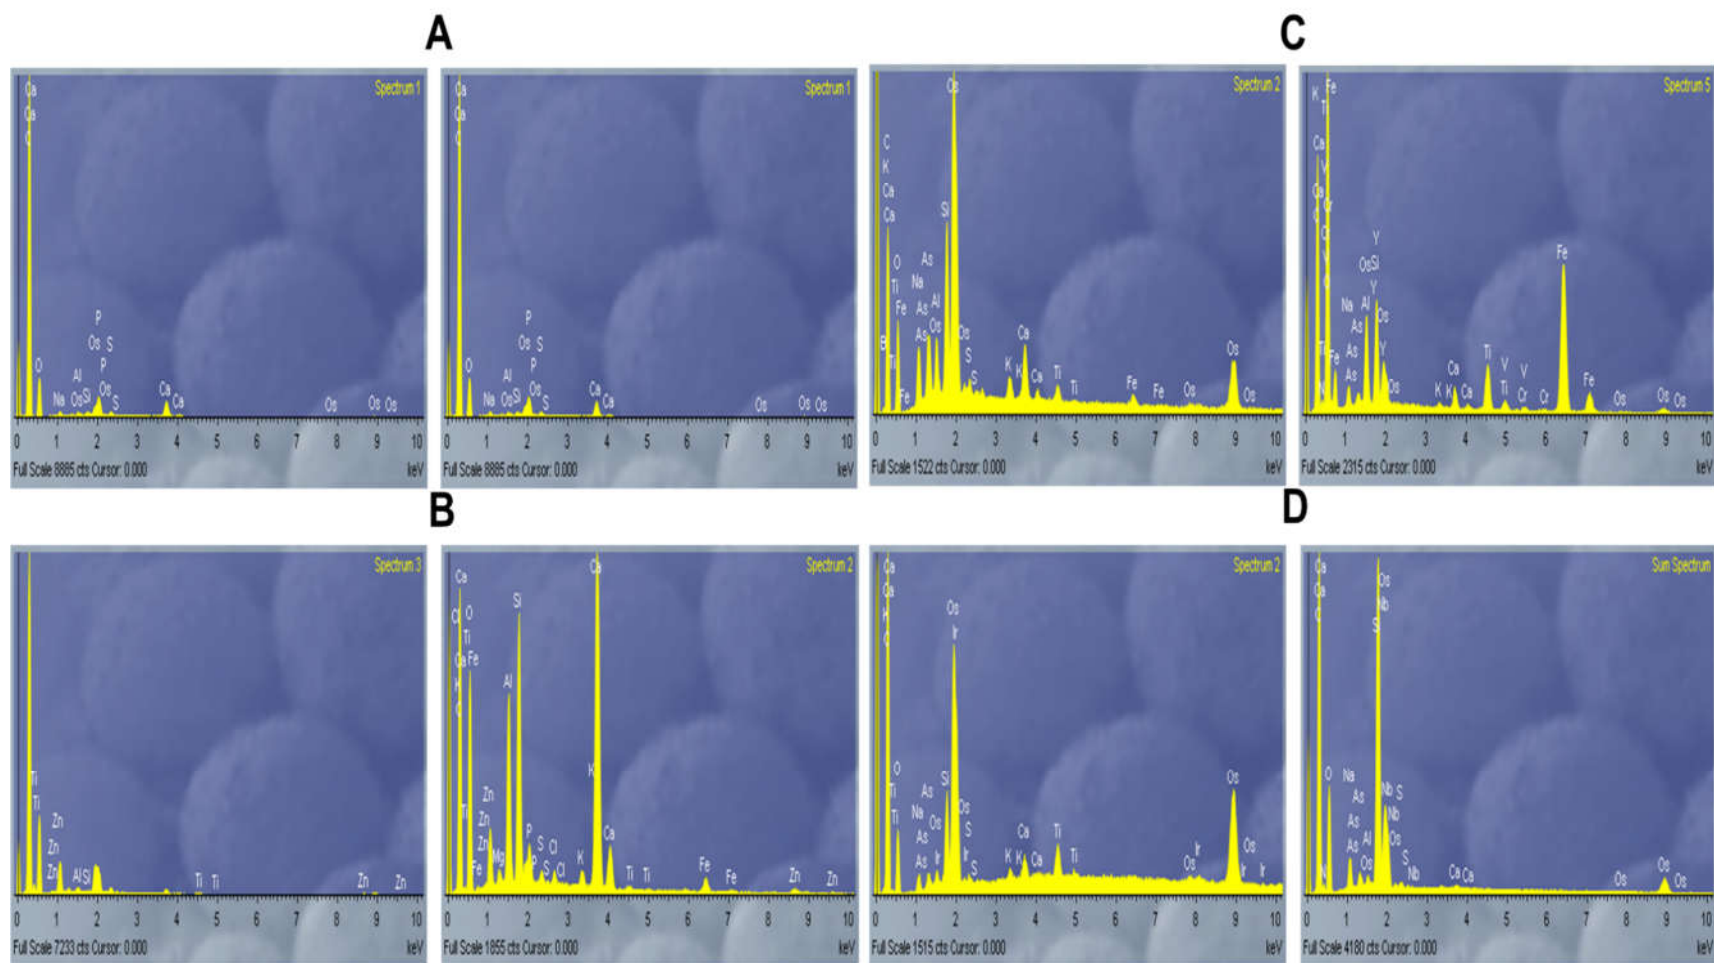

**Figure S4.** EDX images (corresponding to Figure 4) of the fronds (left) and roots (right) of *S. polyrhiza* control (**A**), *S. polyrhiza* exposed to 100% (v/v) SUN1 (**B**) and SUN3 (**C**) PR-ENMs.
